# Supplementary material
Source: Elsevier journal article supplement (https://lshtm-eprints-repo-prod.lshtm-eprints.cdl.cosector.com/4657937/2/mmc1.pdf)
Supplement: mmc1 [file mmc1.pdf]

# THE LANCET

## Microbe

### Supplementary appendix

This appendix formed part of the original submission and has been peer reviewed. We post it as supplied by the authors.

Supplement to: Okomo U, Senghore M, Darboe S, et al. Investigation of sequential outbreaks of *Burkholderia cepacia* and multidrug-resistant extended spectrum  $\beta$ -lactamase producing *Klebsiella* species in a West African tertiary hospital neonatal unit: a retrospective genomic analysis. *Lancet Microbe* 2020; **1**: e119–29.

## Web extra material

### Contents

|                                                                                                                                                                                                                                                          |    |
|----------------------------------------------------------------------------------------------------------------------------------------------------------------------------------------------------------------------------------------------------------|----|
| Supplementary Table 1: OVID combined search strategy for Global Health, Embase and MEDLINE .....                                                                                                                                                         | 2  |
| Supplementary Table 2: PubMed search strategy .....                                                                                                                                                                                                      | 3  |
| Supplementary Table 3: Antibiotic dosing for treatment of neonatal sepsis at EFSTH, Banjul, The Gambia .....                                                                                                                                             | 4  |
| Supplementary Table 4: Clinical case definition for suspected sepsis.....                                                                                                                                                                                | 5  |
| Supplementary Table 5: Pathogens isolated from newborn blood cultures on the neonatal ward, EFSTH, between March and December 2016 .....                                                                                                                 | 6  |
| Supplementary Table 6: Characteristics and outcomes of neonates with <i>Burkholderia cepacia</i> bloodstream infection during an outbreak at the neonatal ward, EFSTH, between March and August 2016 .....                                               | 7  |
| Supplementary Table 7: List of environmental samples cultured during the investigation of an outbreak of neonatal <i>Burkholderia cepacia</i> bloodstream infection at the neonatal ward, EFSTH .....                                                    | 8  |
| Supplementary Table 8: Pathogens isolated from randomly selected sponges used by mothers to bath babies admitted during the investigation of an outbreak of neonatal <i>Burkholderia cepacia</i> bloodstream infection at the neonatal ward, EFSTH ..... | 9  |
| Supplementary Table 9: Antibiotic susceptibility profile for <i>Burkholderia cepacia</i> isolates .....                                                                                                                                                  | 10 |
| Supplementary Table 10: Characteristics and outcomes of neonates with <i>Klebsiella</i> bloodstream infection during an outbreak at the neonatal ward, EFSTH, between October and December 2016 .....                                                    | 11 |
| Supplementary Table 11: Accession numbers of genome sequence data for <i>Burkholderia cepacia</i> isolates.....                                                                                                                                          | 12 |
| Supplementary Table 12: Accession numbers of genome sequence data for <i>Klebsiella</i> isolates. ....                                                                                                                                                   | 13 |

## Supplementary Table 1: OVID combined search strategy for Global Health, Embase and MEDLINE

|                             |                                                                                                                                                                                                                                                                                                                                                    |
|-----------------------------|----------------------------------------------------------------------------------------------------------------------------------------------------------------------------------------------------------------------------------------------------------------------------------------------------------------------------------------------------|
| <b>last run via:</b>        | <b>OVID</b>                                                                                                                                                                                                                                                                                                                                        |
| <b>Search Screen:</b>       | <b>Advanced Search</b>                                                                                                                                                                                                                                                                                                                             |
| <b>Databases:</b>           | <b>Journals@Ovid Full Text February 03, 2020,<br/>Embase [1980 to 2020 Week 4],<br/>Embase Classic + Embase 1947 to 2020 February 03<br/>Global Health [1910 to 2020 Week 4],<br/>Ovid MEDLINE(R) Epub Ahead of Print, In-Process &amp; Other Non-Indexed Citations, Ovid MEDLINE(R)<br/>Daily and Ovid MEDLINE(R) [1946 to February 03, 2020]</b> |
| <b>Date of last search:</b> | <b>6<sup>th</sup> June 2018</b>                                                                                                                                                                                                                                                                                                                    |
| 1                           | ((infant* or newborn* or neonat*) adj9 sepsi) 87                                                                                                                                                                                                                                                                                                   |
| 2                           | ((infant* or newborn* or neonat*) adj9 meningitis) 21908                                                                                                                                                                                                                                                                                           |
| 3                           | ((infant* or newborn* or neonat*) adj9 sepsis) 46996                                                                                                                                                                                                                                                                                               |
| 4                           | ((infant* or newborn* or neonat*) adj9 pneumonia) 21669                                                                                                                                                                                                                                                                                            |
| 5                           | ((infant* or newborn* or neonat*) adj9 bacteri* adj9 infect*) 12352                                                                                                                                                                                                                                                                                |
| 6                           | (nosocomial adj9 infect*) 113139                                                                                                                                                                                                                                                                                                                   |
| 7                           | (hospital adj9 acquired adj9 infect*). 62804                                                                                                                                                                                                                                                                                                       |
| 8                           | (health adj9 care adj9 associated adj9 infect*) 13782                                                                                                                                                                                                                                                                                              |
| 9                           | (outbreak or epidemic or cluster). 1382519                                                                                                                                                                                                                                                                                                         |
| 10                          | (nursery or nurseries or ward or NICU or unit). 2527228                                                                                                                                                                                                                                                                                            |
| 11                          | (whole adj9 genome adj9 sequencing) 67852                                                                                                                                                                                                                                                                                                          |
| 12                          | 1 or 2 or 3 or 4 or 5 88627                                                                                                                                                                                                                                                                                                                        |
| 13                          | 6 or 7 or 8 or 9 1510178                                                                                                                                                                                                                                                                                                                           |
| 14                          | 11 and 12 and 13 175                                                                                                                                                                                                                                                                                                                               |
| 15                          | Remove duplicates from 14 154                                                                                                                                                                                                                                                                                                                      |

**Supplementary Table 2: PubMed search strategy**

|                             |                                        |
|-----------------------------|----------------------------------------|
| <b>last run via:</b>        | <b>US National Library of Medicine</b> |
| <b>Search Screen:</b>       | <b>Advanced Search</b>                 |
| <b>Database:</b>            | <b>PubMed</b>                          |
| <b>Date of last search:</b> | <b>6<sup>th</sup> February 2020</b>    |
| <b>Filters</b>              | <b>None</b>                            |

| Search | Query                                                                                                                                                                                                                                                                                                                                                                   | Items found |
|--------|-------------------------------------------------------------------------------------------------------------------------------------------------------------------------------------------------------------------------------------------------------------------------------------------------------------------------------------------------------------------------|-------------|
| #6     | Search (((((((neonat*) OR newborn) OR infant) OR babies)) AND (((((infection) OR sepsis) OR septic) OR nosocomial infection) OR hospital-acquired infection) OR health-care associated infection)) AND (((outbreak) OR epidemic) OR cluster)) AND ((((((center(s)) OR unit(s)) OR nursery) OR nurseries) OR hospital(s)) OR NICU) OR ward)) AND whole-genome sequencing | 95          |
| #5     | Search whole-genome sequencing                                                                                                                                                                                                                                                                                                                                          | 26483       |
| #4     | Search ((((((center(s)) OR unit(s)) OR nursery) OR nurseries) OR hospital(s)) OR NICU) OR ward                                                                                                                                                                                                                                                                          | 2863931     |
| #3     | Search ((outbreak) OR epidemic) OR cluster                                                                                                                                                                                                                                                                                                                              | 428270      |
| #2     | Search (((((infection) OR sepsis) OR septic) OR nosocomial infection) OR hospital-acquired infection) OR health-care associated infection                                                                                                                                                                                                                               | 3132153     |
| #1     | Search ((neonat*) OR newborn) OR infant) OR babies                                                                                                                                                                                                                                                                                                                      | 1420357     |

**Translations**

|                                  |                                                                                                                                                                                                                                                                                 |
|----------------------------------|---------------------------------------------------------------------------------------------------------------------------------------------------------------------------------------------------------------------------------------------------------------------------------|
| newborn                          | "infant, newborn"[MeSH Terms] OR ("infant"[All Fields] AND "newborn"[All Fields]) OR "newborn infant"[All Fields] OR "newborn"[All Fields]                                                                                                                                      |
| infant                           | "infant"[MeSH Terms] OR "infant"[All Fields]                                                                                                                                                                                                                                    |
| babies                           | "infant"[MeSH Terms] OR "infant"[All Fields] OR "babies"[All Fields]                                                                                                                                                                                                            |
| infection                        | "infections"[MeSH Terms] OR "infections"[All Fields] OR "infection"[All Fields]                                                                                                                                                                                                 |
| sepsis                           | "sepsis"[MeSH Terms] OR "sepsis"[All Fields]                                                                                                                                                                                                                                    |
| nosocomial infection             | "cross infection"[MeSH Terms] OR ("cross"[All Fields] AND "infection"[All Fields]) OR "cross infection"[All Fields] OR ("nosocomial"[All Fields] AND "infection"[All Fields]) OR "nosocomial infection"[All Fields]                                                             |
| hospital-acquired infection      | "cross infection"[MeSH Terms] OR ("cross"[All Fields] AND "infection"[All Fields]) OR "cross infection"[All Fields] OR ("hospital"[All Fields] AND "acquired"[All Fields] AND "infection"[All Fields]) OR "hospital acquired infection"[All Fields]                             |
| health-care associated infection | "cross infection"[MeSH Terms] OR ("cross"[All Fields] AND "infection"[All Fields]) OR "cross infection"[All Fields] OR ("health"[All Fields] AND "care"[All Fields] AND "associated"[All Fields] AND "infection"[All Fields]) OR "health care associated infection"[All Fields] |
| outbreak                         | "disease outbreaks"[MeSH Terms] OR ("disease"[All Fields] AND "outbreaks"[All Fields]) OR "disease outbreaks"[All Fields] OR "outbreak"[All Fields]                                                                                                                             |
| epidemic                         | "epidemics"[MeSH Terms] OR "epidemics"[All Fields] OR "epidemic"[All Fields]                                                                                                                                                                                                    |
| cluster                          | "Proc IEEE Int Conf Clust Comput"[Journal] OR "cluster"[All Fields]                                                                                                                                                                                                             |
| nursery                          | "nurseries, infant"[MeSH Terms] OR ("nurseries"[All Fields] AND "infant"[All Fields]) OR "infant nurseries"[All Fields] OR "nursery"[All Fields]                                                                                                                                |
| nurseries                        | "nurseries, infant"[MeSH Terms] OR ("nurseries"[All Fields] AND "infant"[All Fields]) OR "infant nurseries"[All Fields] OR "nurseries"[All Fields]                                                                                                                              |
| hospital                         | "hospitals"[MeSH Terms] OR "hospitals"[All Fields] OR "hospital"[All Fields]                                                                                                                                                                                                    |
| NICU                             | "intensive care units, neonatal"[MeSH Terms] OR ("intensive"[All Fields] AND "care"[All Fields] AND "units"[All Fields] AND "neonatal"[All Fields]) OR "neonatal intensive care units"[All Fields] OR "nicu"[All Fields]                                                        |
| whole-genome sequencing          | "whole genome sequencing"[MeSH Terms] OR ("whole"[All Fields] AND "genome"[All Fields] AND "sequencing"[All Fields]) OR "whole genome sequencing"[All Fields]                                                                                                                   |

**Supplementary Table 3: Antibiotic dosing for treatment of neonatal sepsis at EFSTH, Banjul, The Gambia**

| Antibiotic                 | Dose          | Frequency       |                 | Route    | Duration    |
|----------------------------|---------------|-----------------|-----------------|----------|-------------|
|                            |               | < 7 days of age | ≥ 7 days of age |          |             |
| <b>1<sup>st</sup> Line</b> |               |                 |                 |          |             |
| Ampicillin                 | 50mg/kg/dose  | 12 hourly       | 8 hourly        | IV or IM | 7 – 10 days |
| Cloxacillin                | 50mg/kg/dose  | 12 hourly       | 8 hourly        | IV       | 7 – 10 days |
| Gentamicin sulphate        | 2.5mg/kg/dose | 12 hourly       | 8 hourly        | IV or IM | 7 – 10 days |
| <b>2<sup>nd</sup> Line</b> |               |                 |                 |          |             |
| Ceftriaxone                | 100mg/kg/dose | daily           | daily           | IV       | 21 days     |

IV= intravenous; IM=intramuscular

**Supplementary Table 4: Clinical case definition for suspected sepsis**

---

|                                                  |
|--------------------------------------------------|
| History of convulsion                            |
| Fast breathing (respiratory rate $\geq 60$ /min) |
| Severe chest in-drawing                          |
| Axillary temperature $>37.5^{\circ}\text{C}$     |
| Axillary temperature $<35.5^{\circ}\text{C}$     |
| Lethargic or less than normal movement           |
| History of feeding problems                      |

---

**Supplementary Table 5: Pathogens isolated from newborn blood cultures on the neonatal ward, EFSTH, between March and December 2016**

| 2016               | Number of blood cultures performed | Number of negative cultures | Number of positive cultures with a clinically significant isolate | Number of positive cultures with a clinically non-significant isolate | clinically non-significant isolates                                                 |
|--------------------|------------------------------------|-----------------------------|-------------------------------------------------------------------|-----------------------------------------------------------------------|-------------------------------------------------------------------------------------|
| January & February |                                    |                             |                                                                   |                                                                       | No blood cultures performed                                                         |
| March              | 15                                 | 7                           | 5                                                                 | 3                                                                     | CoNS 1, <i>Micrococcus</i> 1, <i>Pseudomonas luteola</i> 1                          |
| April              | 14                                 | 6                           | 5                                                                 | 3                                                                     | CoNS 1, <i>Viridans Streptococci</i> 2                                              |
| May                | 19                                 | 7                           | 8                                                                 | 4                                                                     | CoNS 2, <i>Bacillus</i> spp 2                                                       |
| June               | 35                                 | 9                           | 17                                                                | 9                                                                     | CoNS 8, <i>Micrococcus</i> 1                                                        |
| July               | 28                                 | 5                           | 20                                                                | 3                                                                     | CoNS 3                                                                              |
| August             | 46                                 | 5                           | 33                                                                | 8                                                                     | CoNS 8                                                                              |
| September          | 16                                 | 3                           | 10                                                                | 3                                                                     | CoNS 3                                                                              |
| October            | 44                                 | 18                          | 19                                                                | 7                                                                     | CoNS 6, <i>Micrococcus</i> 1                                                        |
| November           | 60                                 | 16                          | 33                                                                | 11                                                                    | CoNS 7, <i>Micrococcus</i> 1, <i>Viridans Streptococci</i> 2, <i>Diphtheroids</i> 1 |
| December           | 44                                 | 10                          | 28                                                                | 6                                                                     | CoNS 4, <i>Bacillus</i> spp 2                                                       |
| <b>Total</b>       | <b>321</b>                         | <b>86</b>                   | <b>178</b>                                                        | <b>57</b>                                                             |                                                                                     |

**Supplementary Table 6: Characteristics and outcomes of neonates with *Burkholderia cepacia* bloodstream infection during an outbreak at the neonatal ward, EFSTH, between March and August 2016**

| ID                       | Sex | Birth weight | Referral type       | Admission date | Date of collection of <i>B. cepacia</i> positive blood culture sample | Age at culture (days) | Outcome    |
|--------------------------|-----|--------------|---------------------|----------------|-----------------------------------------------------------------------|-----------------------|------------|
| Patient B1               | M   | 3.5          | Private clinic      | 07/03/16       | 08/03/16                                                              | 17                    | Discharged |
| Patient B2               | M   | 3.9          | Government facility | 08/03/16       | 09/03/16                                                              | 2                     | Died       |
| Patient B3               | F   | 3.0          | Government facility | 09/03/16       | 10/03/16                                                              | 1                     | Died       |
| Patient B4               | F   | 3.7          | Private clinic      | 14/04/16       | 15/04/16                                                              | 3                     | Discharged |
| Patient B5               | F   | 2.7          | Government facility | 16/05/16       | 16/05/16                                                              | 2                     | Died       |
| Patient B6               | F   | 3.2          | Private clinic      | 06/06/16       | 07/06/16                                                              | 5                     | Discharged |
| Patient B7               | M   | ..           | EFSTH (inborn)      | 09/06/16       | 16/06/16                                                              | 7                     | Discharged |
| Patient B8               | F   | 3.0          | Government facility | 14/06/16       | 16/06/16                                                              | 4                     | Died       |
| Patient B9               | F   | ..           | ..                  | 14/06/16       | 16/06/16                                                              | 2                     | Discharged |
| Patient B10              | M   | ..           | EFSTH (inborn)      | 05/06/16       | 16/06/16                                                              | 11                    | Discharged |
| Patient B11              | F   | 2.0          | Government facility | 14/06/16       | 20/06/16                                                              | 8                     | Died       |
| Patient B12              | M   | 2.0          | Inborn              | 17/06/16       | 20/06/16                                                              | 3                     | Discharged |
| Patient B13              | M   | 3.5          | Government facility | 21/06/16       | 22/06/16                                                              | 2                     | Died       |
| Patient B14              | M   | ..           | ..                  | 22/06/16       | 23/06/16                                                              | 1                     | ..         |
| Patient B15              | M   | ..           | ..                  | ..             | 23/06/16                                                              | 7                     | ..         |
| Patient B16              | M   | ..           | ..                  | ..             | 23/06/16                                                              | 7                     | ..         |
| Patient B17              | F   | ..           | ..                  | ..             | 24/06/16                                                              | 8                     | ..         |
| Patient B18              | F   | ..           | ..                  | ..             | 29/06/16                                                              | 4                     | ..         |
| Patient B19 <sup>a</sup> | M   | 2.1          | Government facility | 27/06/16       | 07/07/16                                                              | 11                    | Discharged |
| Patient B20              | M   | ..           | ..                  | ..             | 30/06/16                                                              | 2                     | ..         |
| Patient B21              | F   | 3.1          | Government facility | 04/07/16       | 09/07/16                                                              | 5                     | Died       |
| Patient B22              | M   | 3.0          | Government facility | 30/06/16       | 11/07/16                                                              | 12                    | Discharged |
| Patient B23              | M   | 2.0          | Government facility | 10/07/16       | 13/07/16                                                              | 5                     | Discharged |
| Patient B24              | M   | 3.0          | Government facility | 13/07/16       | 13/07/16                                                              | 1                     | Died       |
| Patient B25              | F   | ..           | Private clinic      | 13/07/16       | 14/07/16                                                              | 1                     | Died       |
| Patient B26              | M   | 2.1          | Government facility | 24/07/16       | 27/07/16                                                              | 3                     | Died       |
| Patient B27              | F   | 1.1          | Government facility | 25/07/16       | 27/07/16                                                              | 4                     | Died       |
| Patient B28              | M   | 4.0          | Government facility | 28/07/16       | 02/08/16                                                              | 6                     | Died       |
| Patient B29              | F   | ..           | ..                  | 03/08/16       | 03/08/16                                                              | 5                     | Discharged |
| Patient B30              | F   | 1.1          | Government facility | 28/07/16       | 03/08/16                                                              | 6                     | Discharged |
| Patient B31 <sup>b</sup> | F   | 3.0          | Government facility | 01/08/16       | 03/08/16                                                              | 2                     | Died       |
| Patient B32 <sup>c</sup> | F   | ..           | ..                  | 02/08/16       | 03/08/16                                                              | 2                     | Alive      |
| Patient B33 <sup>d</sup> | M   | 3.0          | Government facility | 03/08/16       | 04/08/16                                                              | 1                     | Died       |
| Patient B34 <sup>c</sup> | F   | ..           | ..                  | 02/08/16       | 08/08/16                                                              | 7                     | Alive      |
| Patient B35              | F   | 1.0          | Government facility | 04/08/16       | 08/08/16                                                              | 5                     | Died       |
| Patient B36              | F   | 2.1          | Government facility | 05/08/16       | 08/08/16                                                              | 3                     | Discharged |
| Patient B37 <sup>e</sup> | F   | 3.0          | Government facility | 08/08/16       | 09/08/16                                                              | 1                     | Discharged |
| Patient B38              | M   | ..           | ..                  | ..             | 09/08/16                                                              | 6                     | ..         |
| Patient B39              | M   | ..           | ..                  | ..             | 09/08/16                                                              | 15                    | ..         |
| Patient B40              | F   | ..           | ..                  | ..             | 11/08/16                                                              | 8                     | Discharged |
| Patient B41              | F   | 1.1          | Government facility | 05/08/16       | 12/08/16                                                              | 7                     | Discharged |
| Patient B42              | M   | 1.6          | Home                | 06/08/16       | 12/08/16                                                              | 6                     | Died       |
| Patient B43              | M   | ..           | ..                  | 16/08/16       | 16/08/16                                                              | 2                     | ..         |
| Patient B44 <sup>f</sup> | M   | 3.0          | Government facility | 18/08/16       | 22/08/16                                                              | 12                    | Discharged |
| Patient B45              | F   | ..           | ..                  | ..             | 22/08/16                                                              | 2                     | ..         |
| Patient B46              | F   | ..           | ..                  | ..             | 22/08/16                                                              | 13                    | ..         |
| Patient B47 <sup>c</sup> | F   | ..           | ..                  | 02/08/16       | 23/08/16                                                              | 22                    | Died       |
| Patient B48              | M   | ..           | ..                  | ..             | 23/08/16                                                              | 6                     | Died       |
| Patient B49 <sup>g</sup> | F   | ..           | ..                  | ..             | 29/08/16                                                              | 14                    | Discharged |

<sup>a</sup> This baby had a previous (admission) blood culture positive for *Pseudomonas*

<sup>b</sup> This baby had mixed infection with *Acinetobacter baumannii*.

<sup>c</sup> This baby remained critically ill throughout admission until her eventual death, with 3 consecutive blood cultures positive for *Burkholderia cepacia*

<sup>d</sup> This baby had mixed infection with *Acinetobacter baumannii*.

<sup>e</sup> This baby had a previous (admission) blood culture positive for *Acinetobacter baumannii*

<sup>f</sup> This baby had a previous (admission) blood culture positive for *Staphylococcus aureus*

<sup>g</sup> This baby had mixed infection with *Staphylococcus aureus*.

.. information not available



**Supplementary Table 7: List of environmental samples cultured during the investigation of an outbreak of neonatal *Burkholderia cepacia* bloodstream infection at the neonatal ward, EFSTH**

| Samples (number of sources/samples collected)                | Type of sample | Date of collection | Culture result             |
|--------------------------------------------------------------|----------------|--------------------|----------------------------|
| IV fluid – 10% Dextrose with/without NaCl and KCl [In use]   | Fluid          | 05/09/2016         | <i>B. cepacia</i> isolated |
| Injection - Gentamicin - diluted with Normal saline [In use] | Fluid          | 05/09/2016         | <i>B. cepacia</i> isolated |
| IV fluid – 10% Dextrose with/without NaCl and KCl [In use]   | Fluid          | 08/09/2016         | <i>B. cepacia</i> isolated |
| IV fluid – 10% Dextrose with/without NaCl and KCl [In use]   | Fluid          | 08/09/2016         | <i>B. cepacia</i> isolated |
| Injection - Metronidazole [In use]                           | Fluid          | 08/09/2016         | <i>B. cepacia</i> isolated |
| IV fluid – Normal saline [In use]                            | Fluid          | 08/09/2016         | <i>B. cepacia</i> isolated |
| Water from O <sub>2</sub> humidifier (1)                     | Fluid          | 05/09/2016         | No growth                  |
| Hand sanitizer (2)                                           | Fluid          | 05/09/2016         | No growth                  |
| Tap water from main ward (1)                                 | Fluid          | 05/09/2016         | No growth                  |
| Tap water from critical care ward (1)                        | Fluid          | 08/09/2016         | No growth                  |
| Water from O <sub>2</sub> humidifier (2)                     | Fluid          | 08/09/2016         | No growth                  |
| IV fluid – Ringer lactate [In use] (1)                       | Fluid          | 08/09/2016         | No growth                  |
| IV fluid – 10% dextrose [Stock] (2)                          | Fluid          | 08/09/2016         | No growth                  |
| IV fluid – Normal saline [In use] (1)                        | Fluid          | 08/09/2016         | No growth                  |
| IV fluid – Norman saline [Stock] (1)                         | Fluid          | 08/09/2016         | No growth                  |
| IV fluid – Ringer lactate [Stock] (2)                        | Fluid          | 08/09/2016         | No growth                  |
| Injection - Gentamicin [In use] (1)                          | Fluid          | 08/09/2016         | No growth                  |
| Injection - Ciprofloxacin [In use] (2)                       | Fluid          | 08/09/2016         | No growth                  |
| Injection - Ceftriaxone [In use] (1)                         | Fluid          | 08/09/2016         | No growth                  |
| Injection - Metronidazole [In use] (1)                       | Fluid          | 08/09/2016         | No growth                  |
| Injection - Ceftazidime [In use] (1)                         | Fluid          | 08/09/2016         | No growth                  |
| Injection - Gentamicin [Stock] (2)                           | Fluid          | 08/09/2016         | No growth                  |
| Injection - Vitamin K (1)                                    | Fluid          | 08/09/2016         | No growth                  |
| Injection - 5 % glucose [Stock] (2)                          | Fluid          | 08/09/2016         | No growth                  |
| Injection - Metronidazole [Stock] (1)                        | Fluid          | 08/09/2016         | No growth                  |
| Water for injection (1)                                      | Fluid          | 08/09/2016         | No growth                  |
| Povidone iodine (1)                                          | Fluid          | 08/09/2016         | No growth                  |
| Clean magic [Cleaning fluid; concentrated & diluted] (1)     | Fluid          | 08/09/2016         | No growth                  |
| Feeding pot (2)                                              | Swab           | 05/09/2016         | No growth                  |
| Incubator surface (1)                                        | Swab           | 05/09/2016         | No growth                  |
| Kidney dish (2)                                              | Swab           | 05/09/2016         | No growth                  |
| Sink surface (2)                                             | Swab           | 05/09/2016         | No growth                  |
| Bed surface (4 beds)                                         | Swab           | 05/09/2016         | No growth                  |
| BACTEC 9050 Instrument surface (1)                           | Swab           | 05/09/2016         | No growth                  |
| Umbilicus (3 babies)                                         | Swab           | 05/09/2016         | No growth                  |
| Nasal prong [In use] (4)                                     | Swab           | 05/09/2016         | No growth                  |
| Stethoscope (2)                                              | Swab           | 05/09/2016         | No growth                  |
| Radiant heater (3)                                           | Swab           | 05/09/2016         | No growth                  |
| IV cannula (3)                                               | Swab           | 05/09/2016         | No growth                  |
| Suction tube (1)                                             | Swab           | 05/09/2016         | No growth                  |
| Thermometer (1)                                              | Swab           | 05/09/2016         | No growth                  |
| Weighing scale (1)                                           | Swab           | 05/09/2016         | No growth                  |
| Staff hands (2 staff)                                        | Swab           | 05/09/2016         | No growth                  |

**Supplementary Table 8: Pathogens isolated from randomly selected sponges used by mothers to bath babies admitted during the investigation of an outbreak of neonatal *Burkholderia cepacia* bloodstream infection at the neonatal ward, EFSTH**

| Sample    | Location           | Date of collection | Culture result                                                                                   |
|-----------|--------------------|--------------------|--------------------------------------------------------------------------------------------------|
| Sponge 1  | Critical care ward | 05/09/2016         | <i>Acinetobacter baumannii</i> , <i>Escherichia coli</i> , <i>Rhizobium radiobacter</i>          |
| Sponge 2  | Critical care ward | 05/09/2016         | <i>Klebsiella pneumoniae</i> , <i>Pseudomonas aeruginosa</i> , <i>Acinetobacter baumannii</i>    |
| Sponge 3  | Critical care ward | 05/09/2016         | <i>Acinetobacter baumannii</i> , <i>Vibrio metselinlavii</i> , <i>Chryseobacterium intogenes</i> |
| Sponge 4  | Critical care ward | 05/09/2016         | <i>Klebsiella pneumoniae</i> , <i>Acinetobacter baumannii</i>                                    |
| Sponge 5  | Stable ward        | 05/09/2016         | <i>Acinetobacter baumannii</i> , <i>Chryseobacterium intogenes</i>                               |
| Sponge 6  | Stable ward        | 05/09/2016         | <i>Chryseobacterium intogenes</i> , <i>Klebsiella pneumoniae</i> , CoNS                          |
| Sponge 7  | Stable ward        | 05/09/2016         | <i>Pseudomonas luteola</i> , <i>Acinetobacter baumannii</i>                                      |
| Sponge 8  | Stable ward        | 05/09/2016         | <i>Acinetobacter baumannii</i> , CoNS                                                            |
| Sponge 9  | Sepsis ward        | 05/09/2016         | <i>Klebsiella pneumoniae</i> , <i>Pseudomonas luteola</i>                                        |
| Sponge 10 | Sepsis ward        | 05/09/2016         | <i>Acinetobacter haematolyticus</i> , <i>Escherichia coli</i> ,                                  |

**Supplementary Table 9: Antibiotic susceptibility profile for *Burkholderia cepacia* isolates**

| Isolate ID | Source                                            | SXT | CAZ | C | MER | CN | CIP |
|------------|---------------------------------------------------|-----|-----|---|-----|----|-----|
| B1         | Patient (outbreak isolate)                        | S   | S   | S | S   | S  | S   |
| B2         | Patient (outbreak isolate)                        | S   | S   | S | S   | S  | S   |
| B3         | Patient (outbreak isolate)                        | S   | S   | S | S   | S  | S   |
| B4         | Patient (outbreak isolate)                        | S   | S   | S | S   | S  | S   |
| B5         | Patient (outbreak isolate)                        | S   | S   | S | S   | S  | S   |
| B6         | Patient (outbreak isolate)                        | S   | S   | S | S   | S  | S   |
| B7         | Patient (outbreak isolate)                        | S   | S   | S | S   | S  | S   |
| B8         | Patient (outbreak isolate)                        | S   | S   | S | S   | S  | S   |
| B9         | Patient (outbreak isolate)                        | S   | S   | S | S   | S  | S   |
| B10        | Patient (outbreak isolate)                        | S   | S   | S | S   | S  | S   |
| B11        | Patient (outbreak isolate)                        | S   | S   | S | S   | S  | S   |
| B12        | Patient (outbreak isolate)                        | S   | S   | S | S   | S  | S   |
| B13        | Patient (outbreak isolate)                        | S   | S   | S | S   | S  | S   |
| B14        | Patient (outbreak isolate)                        | S   | S   | S | S   | S  | S   |
| B15        | Patient (outbreak isolate)                        | S   | S   | S | S   | S  | S   |
| B16        | Patient (outbreak isolate)                        | S   | S   | S | S   | S  | S   |
| B17        | Patient (outbreak isolate)                        | S   | S   | S | S   | S  | S   |
| B18        | Patient (outbreak isolate)                        | S   | S   | S | S   | S  | S   |
| B19        | Patient (outbreak isolate)                        | S   | S   | S | S   | S  | S   |
| B20        | Patient (outbreak isolate)                        | S   | S   | S | S   | S  | S   |
| B21        | Patient (outbreak isolate)                        | S   | S   | S | S   | S  | S   |
| B22        | Patient (outbreak isolate)                        | S   | S   | S | S   | S  | S   |
| B23        | Patient (outbreak isolate)                        | S   | S   | S | S   | S  | S   |
| B24        | Patient (outbreak isolate)                        | S   | S   | S | S   | S  | S   |
| B25        | Patient (outbreak isolate)                        | S   | S   | S | S   | S  | S   |
| B26        | Patient (outbreak isolate)                        | S   | S   | S | S   | S  | S   |
| B27        | Patient (outbreak isolate)                        | S   | S   | S | S   | S  | S   |
| B28        | Patient (outbreak isolate)                        | S   | S   | S | S   | S  | S   |
| B29        | Patient (outbreak isolate)                        | S   | S   | S | S   | S  | S   |
| B30        | Patient (outbreak isolate)                        | S   | S   | S | S   | S  | S   |
| B31        | Patient (outbreak isolate)                        | S   | S   | S | S   | S  | S   |
| B32        | Patient (outbreak isolate)                        | S   | S   | S | S   | S  | S   |
| B33        | Patient (outbreak isolate)                        | S   | S   | S | S   | S  | S   |
| B34        | Patient (outbreak isolate)                        | S   | S   | S | S   | S  | S   |
| B35        | Patient (outbreak isolate)                        | S   | S   | S | S   | S  | S   |
| B36        | Patient (outbreak isolate)                        | S   | S   | S | S   | S  | S   |
| B37        | Patient (outbreak isolate)                        | S   | S   | S | S   | S  | S   |
| B38        | Patient (outbreak isolate)                        | S   | S   | S | S   | S  | S   |
| B39        | Patient (outbreak isolate)                        | S   | S   | S | S   | S  | S   |
| B40        | Patient (outbreak isolate)                        | S   | S   | S | S   | S  | S   |
| B41        | Patient (outbreak isolate)                        | S   | S   | S | S   | S  | S   |
| B42        | Patient (outbreak isolate)                        | S   | S   | S | S   | S  | S   |
| B43        | Patient (outbreak isolate)                        | S   | S   | S | S   | S  | S   |
| B44        | Patient (outbreak isolate)                        | S   | S   | S | S   | S  | S   |
| B45        | Patient (outbreak isolate)                        | S   | S   | S | S   | S  | S   |
| B46        | Patient (outbreak isolate)                        | S   | S   | S | S   | S  | S   |
| B47        | Patient (outbreak isolate)                        | S   | S   | S | S   | S  | S   |
| B48        | Patient (outbreak isolate)                        | S   | S   | S | S   | S  | S   |
| B49        | Patient (outbreak isolate)                        | S   | S   | S | S   | S  | S   |
| B50        | Environment (Diluted antibiotic - Gentamicin)     | S   | S   | S | S   | S  | S   |
| B51        | Environment (IV fluid – 10% Dextrose)             | S   | S   | S | S   | S  | S   |
| B52        | Environment (IV fluid – Normal saline)            | S   | S   | S | S   | S  | S   |
| B53        | Environment (IV fluid – 10% Dextrose)             | S   | S   | S | S   | S  | S   |
| B54        | Environment (Antibiotic infusion - Metronidazole) | S   | S   | S | S   | S  | S   |
| B55        | Environment (IV fluid – 10% Dextrose)             | S   | S   | S | S   | S  | S   |
| B56        | Patient (Historical isolate)                      | S   | S   | S | S   | S  | S   |
| B57        | Patient (Historical isolate)                      | S   | S   | S | S   | S  | S   |
| B58        | Patient (Historical isolate)                      | S   | S   | S | S   | S  | S   |
| B59        | Patient (Historical isolate)                      | S   | S   | S | S   | S  | S   |
| B60        | Patient (Historical isolate)                      | S   | S   | S | S   | S  | S   |
| B61        | Patient (Non-outbreak isolate)                    | S   | S   | S | S   | R  | S   |

**Supplementary Table 10: Characteristics and outcomes of neonates with *Klebsiella* bloodstream infection during an outbreak at the neonatal ward, EFSTH, between October and December 2016**

| Patient                | Sex | Birth weight (Kg) | Referral type  | Admission date | Date of collection of <i>K. pneumoniae</i> positive blood culture sample | Age at culture (days) | Outcome    | Final species identification (Kleborate profile)         |
|------------------------|-----|-------------------|----------------|----------------|--------------------------------------------------------------------------|-----------------------|------------|----------------------------------------------------------|
| Case K 1               | F   | ..                | ..             | ..             | 26/10/2016                                                               | 6                     | ..         | <i>K. quasipneumoniae</i> subsp. <i>similipneumoniae</i> |
| Case K 2               | M   | 1.5               | ..             | 02/11/2016     | 07/11/2016                                                               | 5                     | ..         | <i>K. quasipneumoniae</i> subsp. <i>similipneumoniae</i> |
| Case K 3               | M   | 4.7               | ..             | 25/10/2016     | 07/11/2016                                                               | 14                    | ..         | <i>K. quasipneumoniae</i> subsp. <i>similipneumoniae</i> |
| Case K 4               | M   | 1.9               | ..             | 01/10/2016     | 07/11/2016                                                               | 37                    | ..         | <i>K. quasipneumoniae</i> subsp. <i>similipneumoniae</i> |
| Case K 5               | F   | 3.6               | EFSTH (inborn) | 08/11/2016     | 08/11/2016                                                               | 5                     | Discharged | <i>K. quasipneumoniae</i> subsp. <i>similipneumoniae</i> |
| Case K 6 <sup>a</sup>  | M   | 3                 | ..             | 07/11/2016     | 10/11/2016                                                               | 5                     | ..         | <i>K. quasipneumoniae</i> subsp. <i>similipneumoniae</i> |
| Case K 7               | M   | ..                | ..             | ..             | 10/11/2016                                                               | 39                    | ..         | <i>K. quasipneumoniae</i> subsp. <i>similipneumoniae</i> |
| Case K 8               | F   | ..                | ..             | ..             | 10/11/2016                                                               | 8                     | ..         | <i>K. quasipneumoniae</i> subsp. <i>similipneumoniae</i> |
| Case K 9               | M   | ..                | ..             | ..             | 12/11/2016                                                               | 4                     | ..         | <i>K. quasipneumoniae</i> subsp. <i>similipneumoniae</i> |
| Case K 10              | F   | 2.5               | EFSTH (inborn) | 14/11/2016     | 15/11/2016                                                               | 1                     | Died       | <i>K. quasipneumoniae</i> subsp. <i>similipneumoniae</i> |
| Case K 11              | M   | ..                | ..             | ..             | 16/11/2016                                                               | 5                     | ..         | <i>K. quasipneumoniae</i> subsp. <i>similipneumoniae</i> |
| Case K 12              | F   | ..                | ..             | ..             | 16/11/2016                                                               | 6                     | ..         | <i>K. quasipneumoniae</i> subsp. <i>similipneumoniae</i> |
| Case K 13              | F   | ..                | ..             | ..             | 16/11/2016                                                               | 15                    | ..         | <i>K. quasipneumoniae</i> subsp. <i>similipneumoniae</i> |
| Case K 14              | M   | ..                | ..             | ..             | 22/11/2016                                                               | 13                    | ..         | <i>K. quasipneumoniae</i> subsp. <i>similipneumoniae</i> |
| Case K 15              | F   | 1.7               | ..             | 21/11/2016     | 25/11/2016                                                               | 4                     | ..         | <i>K. quasipneumoniae</i> subsp. <i>similipneumoniae</i> |
| Case K 16              | F   | 1.4               | ..             | 29/10/2016     | 25/11/2016                                                               | 28                    | ..         | <i>K. quasipneumoniae</i> subsp. <i>similipneumoniae</i> |
| Case K 17              | F   | 3.5               | ..             | 10/11/2016     | 28/11/2016                                                               | 19                    | ..         | <i>Klebsiella pneumoniae</i>                             |
| Case K 18              | M   | ..                | ..             | 29/11/2016     | 30/11/2016                                                               | 2                     | ..         | <i>Klebsiella pneumoniae</i>                             |
| Case K 19              | M   | 0.6               | ..             | 29/11/2016     | 30/11/2016                                                               | 2                     | ..         | <i>K. quasipneumoniae</i> subsp. <i>similipneumoniae</i> |
| Case K 20              | ..  | ..                | ..             | ..             | 30/11/2016                                                               | 6                     | ..         | <i>K. quasipneumoniae</i> subsp. <i>similipneumoniae</i> |
| Case K 21              | M   | 4.5               | ..             | 26/11/2016     | 30/11/2016                                                               | 29                    | ..         | <i>K. quasipneumoniae</i> subsp. <i>similipneumoniae</i> |
| Case K 22              | M   | 2.4               | ..             | 16/11/2016     | 30/11/2016                                                               | 26                    | ..         | <i>K. quasipneumoniae</i> subsp. <i>similipneumoniae</i> |
| Case K 23              | M   | 2.3               | ..             | 29/11/2016     | 05/12/2016                                                               | 6                     | ..         | <i>K. quasipneumoniae</i> subsp. <i>similipneumoniae</i> |
| Case K 24              | M   | 2.9               | ..             | 30/11/2016     | 05/12/2016                                                               | 5                     | ..         | <i>K. quasipneumoniae</i> subsp. <i>similipneumoniae</i> |
| Case K 25              | M   | 0.6               | ..             | 29/11/2016     | 05/12/2016                                                               | 7                     | ..         | <i>K. quasipneumoniae</i> subsp. <i>similipneumoniae</i> |
| Case K 26              | M   | 1.9               | ..             | 29/11/2016     | 07/12/2016                                                               | 9                     | ..         | <i>K. quasipneumoniae</i> subsp. <i>similipneumoniae</i> |
| Case K 27 <sup>b</sup> | M   | 2.79              | EFSTH (inborn) | 01/12/2016     | 07/12/2016                                                               | 10                    | Discharged | <i>Klebsiella pneumoniae</i>                             |
| Case K 28              | F   | 0.8               | Private clinic | 06/12/2016     | 08/12/2016                                                               | 2                     | Discharged | <i>Klebsiella pneumoniae</i>                             |
| Case K 29              | M   | ..                | EFSTH (inborn) | ..             | 08/12/2016                                                               | 13                    | Died       | <i>K. quasipneumoniae</i> subsp. <i>similipneumoniae</i> |
| Case K 30              | M   | 2.3               | Private clinic | 05/12/2016     | 08/12/2016                                                               | 5                     | Died       | <i>K. quasipneumoniae</i> subsp. <i>similipneumoniae</i> |
| Case K 31              | F   | 1.8               | ..             | 13/12/2016     | 15/12/2016                                                               | 3                     | ..         | <i>K. quasipneumoniae</i> subsp. <i>similipneumoniae</i> |
| Case K 32              | F   | 2.65              | ..             | 08/12/2016     | 15/12/2016                                                               | 9                     | ..         | <i>K. quasipneumoniae</i> subsp. <i>similipneumoniae</i> |
| Case K 33              | M   | ..                | ..             | ..             | 19/12/2016                                                               | 15                    | ..         | <i>Klebsiella pneumoniae</i>                             |
| Case K 34              | M   | 2                 | Private clinic | 18/12/2016     | 19/12/2016                                                               | 1                     | Died       | <i>K. quasipneumoniae</i> subsp. <i>similipneumoniae</i> |
| Case K 35              | M   | 1.8               | ..             | 11/12/2016     | 19/12/2016                                                               | 8                     | ..         | <i>K. quasipneumoniae</i> subsp. <i>similipneumoniae</i> |
| Case K 36              | M   | 2.5               | EFSTH (inborn) | 17/12/2016     | 19/12/2016                                                               | 2                     | Died       | <i>Klebsiella pneumoniae</i>                             |
| Case K 37              | F   | 2.5               | Private clinic | 18/12/2016     | 19/12/2016                                                               | 2                     | Discharged | <i>K. quasipneumoniae</i> subsp. <i>similipneumoniae</i> |
| Case K 38              | F   | 2.5               | ..             | 18/12/2016     | 21/12/2016                                                               | 4                     | ..         | <i>K. quasipneumoniae</i> subsp. <i>similipneumoniae</i> |
| Case K 39              | ..  | ..                | ..             | ..             | 22/12/2016                                                               | 4                     | ..         | <i>K. quasipneumoniae</i> subsp. <i>similipneumoniae</i> |
| Case K 40              | M   | 2.9               | ..             | 13/12/2016     | 22/12/2016                                                               | 9                     | ..         | <i>K. quasipneumoniae</i> subsp. <i>similipneumoniae</i> |
| Case K 41              | M   | ..                | ..             | ..             | 22/12/2016                                                               | 5                     | ..         | <i>K. quasipneumoniae</i> subsp. <i>similipneumoniae</i> |
| Case K 42              | F   | ..                | ..             | ..             | 22/12/2016                                                               | 3                     | ..         | <i>K. quasipneumoniae</i> subsp. <i>similipneumoniae</i> |
| Case K 43              | M   | 1.62              | ..             | 20/12/2016     | 27/12/2016                                                               | 7                     | ..         | <i>K. quasipneumoniae</i> subsp. <i>similipneumoniae</i> |
| Case K 44              | F   | 1.6               | ..             | 14/12/2016     | 28/12/2016                                                               | 14                    | ..         | <i>K. quasipneumoniae</i> subsp. <i>similipneumoniae</i> |
| Case K 45              | F   | ..                | ..             | ..             | 28/12/2016                                                               | 1                     | ..         | <i>K. quasipneumoniae</i> subsp. <i>similipneumoniae</i> |

<sup>a</sup> This baby had a previous (admission) blood culture positive for *Coagulase-negative Staphylococcus*

<sup>b</sup> This baby had a previous (admission) blood culture positive for *Staphylococcus aureus*

.. information not available

**Supplementary Table 11: Accession numbers of genome sequence data for *Burkholderia cepacia* isolates.**Data deposited at the European Nucleotide Archive (<https://www.ebi.ac.uk/ena/browser/view/PRJEB20799>)

| Sample ID in paper | Sample accession | Lane accession | Involved in outbreak?                        | Isolation source                    |
|--------------------|------------------|----------------|----------------------------------------------|-------------------------------------|
| B34                | ERS1755800       | ERR2693268     | Yes                                          | Blood                               |
| B38                | ERS1755801       | ERR2693269     | Yes                                          | Blood                               |
| B41                | ERS1755802       | ERR2693270     | Yes                                          | Blood                               |
| B24                | ERS1755803       | ERR2693271     | Yes                                          | Blood                               |
| B47                | ERS1755804       | ERR2693272     | Yes                                          | Blood                               |
| B48                | ERS1755805       | ERR2693273     | Yes                                          | Blood                               |
| B19                | ERS1755806       | ERR2693274     | Yes                                          | Blood                               |
| B42                | ERS1755807       | ERR2693275     | Yes                                          | Blood                               |
| B40                | ERS1755808       | ERR2693276     | Yes                                          | Blood                               |
| B35                | ERS1755809       | ERR2693277     | Yes                                          | Blood                               |
| B45                | ERS1755810       | ERR2693278     | Yes                                          | Blood                               |
| B27                | ERS1755811       | ERR2693279     | Yes                                          | Blood                               |
| B44                | ERS1755812       | ERR2693280     | Yes                                          | Blood                               |
| B46                | ERS1755813       | ERR2693281     | Yes                                          | Blood                               |
| B9                 | ERS1755814       | ERR2693282     | Yes                                          | Blood                               |
| B12                | ERS1755815       | ERR2693283     | Yes                                          | Blood                               |
| B21                | ERS1755816       | ERR2693284     | Yes                                          | Blood                               |
| B1                 | ERS1755817       | ERR2693285     | Yes                                          | Blood                               |
| B10                | ERS1755818       | ERR2693286     | Yes                                          | Blood                               |
| B11                | ERS1755819       | ERR2693287     | Yes                                          | Blood                               |
| B31                | ERS1755820       | ERR2693288     | Yes                                          | Blood                               |
| B23                | ERS1755821       | ERR2693289     | Yes                                          | Blood                               |
| B20                | ERS1755822       | ERR2693290     | Yes                                          | Blood                               |
| B17                | ERS1755823       | ERR2693291     | Yes                                          | Blood                               |
| B30                | ERS1755824       | ERR2693292     | Yes                                          | Blood                               |
| B39                | ERS1755825       | ERR2693293     | Yes                                          | Blood                               |
| B37                | ERS1755826       | ERR2693294     | Yes                                          | Blood                               |
| B54                | ERS1755827       | ERR2693295     | No (Environmental)                           | Antibiotic infusion (Metronidazole) |
| B53                | ERS1755828       | ERR2693296     | No (Environmental)                           | IV fluid (10% dextrose)             |
| B55                | ERS1755829       | ERR2693297     | No (Environmental)                           | IV fluid (10% dextrose)             |
| B51                | ERS1755830       | ERR2693298     | No (Environmental)                           | IV fluid (10% dextrose)             |
| B28                | ERS1755831       | ERR2693299     | Yes                                          | Blood                               |
| B4                 | ERS1755832       | ERR2693300     | Yes                                          | Blood                               |
| B15                | ERS1755859       | ERR2693327     | Yes                                          | Blood                               |
| B5                 | ERS1755860       | ERR2693328     | Yes                                          | Blood                               |
| B18                | ERS1755876       | ERR2693344     | Yes                                          | Blood                               |
| B2                 | ERS1755877       | ERR2693345     | Yes                                          | Blood                               |
| B33                | ERS1755878       | ERR2693346     | Yes                                          | Blood                               |
| B8                 | ERS1755879       | ERR2693347     | Yes                                          | Blood                               |
| B29                | ERS1755880       | ERR2693348     | Yes                                          | Blood                               |
| B26                | ERS1755881       | ERR2693349     | Yes                                          | Blood                               |
| B7                 | ERS1755882       | ERR2693350     | Yes                                          | Blood                               |
| B6                 | ERS1755883       | ERR2693351     | Yes                                          | Blood                               |
| B3                 | ERS1755884       | ERR2693352     | Yes                                          | Blood                               |
| B14                | ERS1755885       | ERR2693353     | Yes                                          | Blood                               |
| B61                | ERS1755886       | ERR2693354     | No (Contemporaneous paediatric ward isolate) | Blood                               |
| B25                | ERS1755887       | ERR2693355     | Yes                                          | Blood                               |
| B16                | ERS1755888       | ERR2693356     | Yes                                          | Blood                               |
| B50                | ERS1755889       | ERR2693357     | No (Environmental)                           | Diluted antibiotic (Gentamicin)     |
| B52                | ERS1755890       | ERR2693358     | No (Environmental)                           | IV fluid (Normal Saline)            |
| B59                | ERS1755896       | ERR2693364     | No (historical isolate)                      | Blood                               |
| B57                | ERS1755897       | ERR2693365     | No (historical isolate)                      | Blood                               |
| B58                | ERS1755898       | ERR2693366     | No (historical isolate)                      | Blood                               |
| B56                | ERS1755899       | ERR2693367     | No (historical isolate)                      | Blood                               |

**Supplementary Table 12: Accession numbers of genome sequence data for *Klebsiella* isolates.**Data deposited at the European Nucleotide Archive (<https://www.ebi.ac.uk/ena/browser/view/PRJEB20799>)

| Sample ID in paper | Sample accession | Lane accession | Involved in outbreak? | Isolation source         |
|--------------------|------------------|----------------|-----------------------|--------------------------|
| K1                 | ERS1755833       | ERR2693301     | Yes                   | Blood                    |
| K4                 | ERS1755834       | ERR2693302     | Yes                   | Blood                    |
| K20                | ERS1755835       | ERR2693303     | Yes                   | Blood                    |
| K21                | ERS1755836       | ERR2693304     | Yes                   | Blood                    |
| K9                 | ERS1755837       | ERR2693305     | Yes                   | Blood                    |
| K19                | ERS1755838       | ERR2693306     | Yes                   | Blood                    |
| K7                 | ERS1755839       | ERR2693307     | Yes                   | Blood                    |
| K8                 | ERS1755840       | ERR2693308     | Yes                   | Blood                    |
| K3                 | ERS1755841       | ERR2693309     | Yes                   | Blood                    |
| K2                 | ERS1755842       | ERR2693310     | Yes                   | Blood                    |
| K11                | ERS1755843       | ERR2693311     | Yes                   | Blood                    |
| K12                | ERS1755844       | ERR2693312     | Yes                   | Blood                    |
| K5                 | ERS1755845       | ERR2693313     | Yes                   | Blood                    |
| K6                 | ERS1755846       | ERR2693314     | Yes                   | Blood                    |
| K16                | ERS1755847       | ERR2693315     | Yes                   | Blood                    |
| K17                | ERS1755848       | ERR2693316     | Yes                   | Blood                    |
| K46                | ERS1755849       | ERR2693317     | No (Environmental)    | IV fluid (Normal Saline) |
| K13                | ERS1755850       | ERR2693318     | Yes                   | Blood                    |
| K15                | ERS1755851       | ERR2693319     | Yes                   | Blood                    |
| K22                | ERS1755852       | ERR2693320     | Yes                   | Blood                    |
| K23                | ERS1755853       | ERR2693321     | Yes                   | Blood                    |
| K24                | ERS1755854       | ERR2693322     | Yes                   | Blood                    |
| K25                | ERS1755855       | ERR2693323     | Yes                   | Blood                    |
| K26                | ERS1755856       | ERR2693324     | Yes                   | Blood                    |
| K27                | ERS1755857       | ERR2693325     | Yes                   | Blood                    |
| K37                | ERS1755862       | ERR2693330     | Yes                   | Blood                    |
| K38                | ERS1755863       | ERR2693331     | Yes                   | Blood                    |
| K39                | ERS1755864       | ERR2693332     | Yes                   | Blood                    |
| K45                | ERS1755865       | ERR2693333     | Yes                   | Blood                    |
| K44                | ERS1755866       | ERR2693334     | Yes                   | Blood                    |
| K36                | ERS1755867       | ERR2693335     | Yes                   | Blood                    |
| K33                | ERS1755868       | ERR2693336     | Yes                   | Blood                    |
| K34                | ERS1755869       | ERR2693337     | Yes                   | Blood                    |
| K40                | ERS1755870       | ERR2693338     | Yes                   | Blood                    |
| K30                | ERS1755871       | ERR2693339     | Yes                   | Blood                    |
| K43                | ERS1755872       | ERR2693340     | Yes                   | Blood                    |
| K32                | ERS1755873       | ERR2693341     | Yes                   | Blood                    |
| K31                | ERS1755874       | ERR2693342     | Yes                   | Blood                    |
| K18                | ERS1755892       | ERR2693360     | Yes                   | Blood                    |
| K28                | ERS1755893       | ERR2693361     | Yes                   | Blood                    |
| K47                | ERS1755894       | ERR2693362     | No (Environmental)    | IV fluid (10% dextrose)  |
